# Supplementary material for: What Can Dietary Patterns Tell Us about the Nutrition Transition and Environmental Sustainability of Diets in Uganda?
Source: MDPI journal article supplement (doi:10.3390/nu11020342), 2019-02-05
Supplement: s1 [file s1]

Table S1: Food Groups used in the Generation of Dietary Patterns for Ugandan Women of Reproductive Age

| Food Group                        | Example food items from the UFCS 24hr recall                                                                                                                                                    | Environmental Impact Category |
|-----------------------------------|-------------------------------------------------------------------------------------------------------------------------------------------------------------------------------------------------|-------------------------------|
| Roots and tubers (boiled)         | Yam, sweet potato, ('irish') potato, cocoyam, cassava, cassava: maize 'atap', cassava 'atap' (cooked by boiling/steaming/eaten raw)                                                             | low                           |
| Roots and tubers (fried)          | Sweet potato, cassava (cooked by shallow/deep-fat frying)                                                                                                                                       | low                           |
| Matooke                           | Matooke (cooking bananas) (cooked by steaming or boiling)                                                                                                                                       | low                           |
| Traditional cereals (boiled)      | Maize, millet, sorghum, sorghum: cassava (2:1) 'atap', (cooked by boiling/steaming)                                                                                                             | low                           |
| Traditional cereals (fried)       | Popcorn, deep-fried maize (hard corn), roasted maize                                                                                                                                            | low                           |
| Rice and pasta                    | White and brown rice, spaghetti, macaroni                                                                                                                                                       | medium                        |
| Bread and Buns                    | Sweet/salty brown/white bread, buns                                                                                                                                                             | low                           |
| Chapatti                          | Chapatti                                                                                                                                                                                        | low                           |
| Red meat                          | Beef, Goat meat, Pork                                                                                                                                                                           | high                          |
| Chicken                           | Chicken                                                                                                                                                                                         | medium                        |
| Fish                              | Nile tilapia, Nile perch, 'mukene', 'nkeje', 'semutundu' (fresh, smoked or sun-dried)                                                                                                           | medium                        |
| Organ meats                       | Intestines (cow/goat), tongue, heart, kidneys, chicken gizzards, 'mulokonyi' (cow hooves)                                                                                                       | high                          |
| Insects                           | Grasshoppers, white ants (termites), bee larvae                                                                                                                                                 | low                           |
| Milk and milk products            | Milk (boiled and fresh), yoghurt, milk tea, 'eshabwe', sour milk                                                                                                                                | medium                        |
| Eggs                              | Boiled eggs, fried egg                                                                                                                                                                          | medium                        |
| Legumes                           | Beans ('nambaale'/ yellow/ white/ black/ kidney/ adzuki) with/without skin; bean sauce; field pea sauce; cow pea sauce; pigeon pea sauce                                                        | low                           |
| Nuts and seeds                    | Pumpkin seeds, sunflower seeds, roasted groundnut seeds, roasted sesame seeds, etc.                                                                                                             | low                           |
| Groundnut sauce                   | Groundnut sauce (sauce made from raw milled ground groundnuts and water), raw pounded groundnuts, sesame seed sauce                                                                             | low                           |
| Fresh fruit and unsweetened juice | Orange, pineapple, mangoes, guavas, raspberries, 'nsali', banana, passion fruit, papaya, guava, lemon, jackfruit, 'empafu'(olive), tangerine, watermelon, fresh fruit juice with no sugar added | low                           |
| Traditional vegetables (boiled)   | 'nakati', spider plant, 'dodo', pumpkin leaves, 'malakwang', cow pea leaves, bean leaves, ntula, okra fruit, okra leaves, pumpkin, 'ensusuti', alayo. (cooked by boiling/steaming/eaten raw)    | low                           |

|                                        |                                                                                                                                                                                    |        |
|----------------------------------------|------------------------------------------------------------------------------------------------------------------------------------------------------------------------------------|--------|
| Traditional vegetables (fried)         | 'nakati', spider plant, 'dodo', pumpkin leaves, 'malakwang', cow pea leaves, bean leaves, ntula, okra fruit, okra leaves, pumpkin, 'ensusuti', alayo (cooked by frying with oil)   | low    |
| Non-traditional vegetables boiled      | Tomatoes, chilli, cucumber, onions, garlic, avocado, carrots, green bell peppers, 'Sukuma wiki' (kale), French beans (green beans), cabbage (cooked by boiling/steaming/eaten raw) | low    |
| Non-traditional vegetables fried       | Tomatoes, chilli, cucumber, onions, garlic, avocado, carrots, green bell peppers, 'Sukuma wiki' (kale), French beans (green beans), cabbage (cooked by frying with oil)            | low    |
| Traditional fats, oils and spreads     | Shea nut butter, 'Muzigo Muganda' (cow ghee), groundnut paste, sesame paste, groundnut-sesame paste                                                                                | medium |
| Non-traditional fats, oils and spreads | Vegetable oil, margarine, hydrogenated vegetable fat                                                                                                                               | medium |
| Katogo                                 | Various combinations of yam, matooke, potatoes, sweet potatoes, legumes, and vegetables in one dish; 'nyoyo'                                                                       | low    |
| Porridge                               | Porridges (from flours of any combination traditional/non-traditional cereals or from composite tubers/roots and cereals flours), 'enturire'                                       | low    |
| Fast food                              | Chips, chaps, chips and liver, sausages, rolex, etc                                                                                                                                | medium |
| Soups                                  | Soups (from beans, beef, goat meat, chicken, pork or fish), tomato soup                                                                                                            | low    |
| Sweets                                 | Biscuits, candies, 'kabalagala', gulusa, doughnuts, 'mandazi', half cake, cake                                                                                                     | medium |
| Savoury snacks                         | Samosas, rice balls                                                                                                                                                                | low    |
| Sugar                                  | Cane sugar (white and brown), sugarcane, honey                                                                                                                                     | low    |
| Sugar-sweetened beverages              | Fruit juice with sugar added, soda (carbonated drinks), 'safi', 'splash' (fruit-flavoured drinks and concentrates)                                                                 | low    |
| Tea                                    | Tea                                                                                                                                                                                | low    |
| Alcohol                                | Processed (bottled) beer, processed (bottled) wine, traditional beers, 'mwenge bigere', 'ajono', 'tonto', 'malwa' (crude beers and gin)                                            | low    |

**Table S2.** Environmental Impact Categories for Food Groups used in the PCA of Ugandan Women's Diets\*<sup>^</sup>.

| low impact (< 1.0 kg CO <sub>2</sub> e/kg) | medium impact (1.0-4.0 kg CO <sub>2</sub> e/kg) | high impact (>4.0 kg CO <sub>2</sub> e/kg) |
|--------------------------------------------|-------------------------------------------------|--------------------------------------------|
| traditional vegetables boiled              | milk and milk products                          | red meat (pork, goat and beef)             |
| traditional vegetables fried               | chicken                                         | organ meats                                |
| non-traditional vegetables boiled          | fish                                            |                                            |
| non-traditional vegetables fried           | rice and pasta                                  |                                            |
| tubers and roots boiled                    | eggs                                            |                                            |
| tubers and roots fried                     | fast food                                       |                                            |

|                                                   |                                        |
|---------------------------------------------------|----------------------------------------|
| traditional cereals boiled                        | traditional fats, oils and spreads     |
| traditional cereals fried                         | non-traditional fats, oils and spreads |
| legumes                                           | sweets                                 |
| bread and buns                                    | savoury snacks                         |
| sugar                                             |                                        |
| groundnut sauce                                   |                                        |
| fruits                                            |                                        |
| soups                                             |                                        |
| insects                                           |                                        |
| porridge (derived from cereals, roots and tubers) |                                        |
| nuts and seeds                                    |                                        |
| chapatti                                          |                                        |
| sugary drinks                                     |                                        |
| alcohol                                           |                                        |
| katogo (plant-based mixed dish)                   |                                        |
| matooke (cooking bananas - plantain)              |                                        |

\*Macdiarmid et al. 2012, ^ Clune et al. 2017.

Table S3.Counts of food categories loading +vely and -vely on dietary patterns and resulting labels

| Count of food categories loading +vely and -vely on principal components |                                                 |                                                 |                                                   |                                                   |                                                  |                                                  | Difference<br>in counts |        |      | label ascribed<br>to dietary<br>pattern |
|--------------------------------------------------------------------------|-------------------------------------------------|-------------------------------------------------|---------------------------------------------------|---------------------------------------------------|--------------------------------------------------|--------------------------------------------------|-------------------------|--------|------|-----------------------------------------|
| principal<br>component<br>(PC)                                           | low impact<br>(count for +ve<br>factor loading) | low impact<br>(count for -ve<br>factor loading) | medium impact<br>(count of +ve<br>factor loading) | medium impact<br>(count of -ve<br>factor loading) | high impact<br>(count for +ve<br>factor loading) | high impact<br>(count for -ve<br>factor loading) | low                     | medium | high |                                         |
| PC1                                                                      | 3                                               | 1                                               | 4                                                 | 0                                                 | 0                                                | 0                                                | 2                       | 4      | 0    | medium                                  |
| PC2                                                                      | 3                                               | 2                                               | 1                                                 | 1                                                 | 0                                                | 0                                                | 1                       | 0      | 0    | low                                     |
| PC3                                                                      | 5                                               | 1                                               | 0                                                 | 0                                                 | 0                                                | 0                                                | 4                       | 0      | 0    | low                                     |
| PC4                                                                      | 1                                               | 1                                               | 1                                                 | 0                                                 | 3                                                | 0                                                | 0                       | 1      | 3    | high                                    |
| *principal components correspond with dietary patterns                   |                                                 |                                                 |                                                   |                                                   |                                                  |                                                  |                         |        |      |                                         |

## NOTES

1. Using thresholds from Mcdiarmid et al. (2012) food groups were classified as low, medium or high depending on the processing stage. Foods in the dataset undergo minimal food processing and the most energy-intensive stage occurs at the primary production stage. Additionally, most food waste occurs post-harvest. It was therefore assumed that the highest environmental impact occurs at the primary production stage i.e. when produce is still fresh for most foods. For this reason, the thresholds were applied to the primary production stage which were obtained from the systematic review by Clune et al. (2017). For a few processed foods e.g. cakes, information was obtained from Mcdiarmid et al. (2012).

2. For insects, whose information was not in either papers, information about impact was obtained from:

(i) Oonincx, D. G. A. B.; de Boer, I. J. M. Environmental Impact of the Production of Mealworms as a Protein Source. *PLoS One*, **2012**, *7*, 1-5, doi: 10.1371/journal.pone.0051145

(ii) Oonincx DGAB, van Itterbeeck J, Heetkamp MJW, van den Brand H, van Loon JJA, et al. (2010) An Exploration of Insect Species Suitable for Animal or Human Consumption. *PLoS One*, **2010**, *5*, 1-7, doi: 10.1371/journal.pone.0014114
